# Supplementary material
Source: Research Square preprint supplement (doi:10.21203/rs.3.rs-9037557/v1)
Supplement: Supplementary file 1 [file b4761e3a2e58ecf289270040.docx]

# **CARE Checklist**

*Consensus-based Clinical Case Reporting Guideline Development*

***Manuscript Title:***

*Reconstruction of dialysis access in an end-stage renal disease patient with severe peritonitis and thoracic deformity: A case report*

| **Topic** | **Checklist Item** | **Include** | **Line** | **状态** |
| --- | --- | --- | --- | --- |
| ****Title**** | Clearly identify as a case report (e.g., "Case Report") | ☑ YES □ No | 1-2 | **Complied** |
| ****Abstract**** | Include background, case description, key findings, and conclusions | ☑ YES □ No | 19-26 | **Complied** |
| ****Keywords**** | Provide 3-6 relevant keywords | ☑ YES □ No | 27-28 | **Complied** |
| ****Introduction**** | Briefly describe the clinical significance and rationale for reporting the case | ☑ YES □ No | 45-61 | **Complied** |
| ****Patient Info**** | Demographic information (age, gender, ethnicity, etc.) | ☑ YES □ No | 65-66 | **Complied** |
| ****Patient Info**** | Main symptoms and medical history | ☑ YES □ No | 68-71 | **Complied** |
| ****Patient Info**** | Past medical history, family history, medication history | ☑ YES □ No | 66-68 | **Complied** |
| ****Clinical Findings**** | Key physical examination findings | ☑ YES □ No | 68-70 | **Complied** |
| ****Clinical Findings**** | Relevant laboratory and imaging results | ☑ YES □ No | 73-77 | **Complied** |
| ****Diagnostic Assessment**** | Diagnostic methods and process | ☑ YES □ No | 77-79 | **Complied** |
| ****Diagnostic Assessment**** | Differential diagnosis considerations | □ Yes ☑ N/A | - | **Not required** |
| ****Therapeutic Intervention**** | Detailed description of treatment measures | ☑ YES □ No | 81-101 | **Complied** |
| ****Therapeutic Intervention**** | Timeline of interventions | ☑ YES □ No | 81-101 | **Complied** |
| ****Follow-up and Outcomes**** | Clinical follow-up results | ☑ YES □ No | 103-106 | **Complied** |
| ****Follow-up and Outcomes**** | Evaluation of intervention effects | ☑ YES □ No | 103-106 | **Complied** |
| ****Discussion**** | Scientific value and clinical significance of the case | ☑ YES □ No | 109-155 | **Complied** |
| ****Discussion**** | Comparison with existing literature | ☑ YES □ No | 158-164 | **Complied** |
| ****Discussion**** | Limitations and conclusions | ☑ YES □ No | 167-169 | **Complied** |
| ****Patient Perspective**** | Patient's experience and perception of treatment (if applicable) | □ Yes ☑ N/A | - | 无需 |
| ****Informed Consent**** | Statement of obtaining informed consent from the patient | ☑ YES □ No | 192-184 | **Complied** |
